# Supplementary material for: Inactivation of NUPR1 promotes cell death by coupling ER-stress responses with necrosis
Source: PubMed Central journal article supplement (PMC6242935; doi:10.1038/s41598-018-35020-3), 2018-11-19
Supplement: 41598_2018_35020_MOESM1_ESM.pdf [file 41598_2018_35020_MOESM1_ESM.pdf]

# **Inactivation of NUPR1 promotes cell death by coupling ER-stress responses with necrosis**

Patricia Santofimia-Castaño<sup>1</sup>, Wenjun Lan<sup>1</sup>, Jennifer Bintz<sup>1</sup>, Odile Gayet<sup>1</sup>, Alice Carrier<sup>1</sup>, Gwen Lomber<sup>2</sup>, José Luis Neira<sup>3</sup>, Antonio González<sup>4</sup>, Raul Urrutia<sup>2</sup>, Philippe Soubeyran<sup>1</sup>, Juan Iovanna<sup>1</sup>

<sup>1</sup>Centre de Recherche en Cancérologie de Marseille (CRCM), INSERM U1068, CNRS UMR 7258, Aix-Marseille Université and Institut Paoli-Calmettes, Parc Scientifique et Technologique de Luminy, Marseille, France; <sup>2</sup>Division of Research, Department of Surgery and the Genomic Sciences and Precision Medicine Center, Medical College of Wisconsin, Milwaukee, USA ; <sup>3</sup>Instituto de Biología Molecular y Celular, Universidad Miguel Hernández, Edificio Torregaitán, Avda. del Ferrocarril s/n, 03202 Elche, Alicante, Spain; <sup>4</sup>Cell Physiology Research Group, Department of Physiology, University of Extremadura, Caceres, Spain.

| <b>Gene name</b> | <b>MiaPaCa2 cells siCtrl gene expression</b> | <b>MiaPaCa2 cells siNUPR1 gene expression</b> |
|------------------|----------------------------------------------|-----------------------------------------------|
| <i>AMFR</i>      | 61,49                                        | 26,99                                         |
| <i>AGR2</i>      | 18,99                                        | 7,63                                          |
| <i>ASF1B</i>     | 44,87                                        | 13,64                                         |
| <i>ATF4</i>      | 75,49                                        | 18,29                                         |
| <i>ATF6</i>      | 448,73                                       | 329,27                                        |
| <i>BCL2</i>      | 253,12                                       | 8,66                                          |
| <i>CALM1</i>     | 66,38                                        | 27,45                                         |
| <i>CALR</i>      | 908,29                                       | 445,96                                        |
| <i>CANX</i>      | 444,36                                       | 46,99                                         |
| <i>CAPS2</i>     | 140,72                                       | 92,51                                         |
| <i>CCT6A</i>     | 4131,92                                      | 1048,25                                       |
| <i>CCT6B</i>     | 241,67                                       | 83,93                                         |
| <i>COPA</i>      | 1760,16                                      | 1381,22                                       |
| <i>DDIT3</i>     | 98,00                                        | 83,00                                         |
| <i>DNAJA1</i>    | 15,04                                        | 5,10                                          |
| <i>DNAJA2</i>    | 1726,94                                      | 854,32                                        |
| <i>DNAJA3</i>    | 419,47                                       | 176,89                                        |
| <i>DNAJA4</i>    | 56,87                                        | 8,66                                          |
| <i>DNAJB1</i>    | 117,76                                       | 21,72                                         |
| <i>DNAJB11</i>   | 2211,27                                      | 769,29                                        |
| <i>DNAJB14</i>   | 260,37                                       | 129,23                                        |
| <i>DNAJB6</i>    | 395,33                                       | 176,33                                        |
| <i>DNAJC10</i>   | 319,00                                       | 178,00                                        |
| <i>DNAJC18</i>   | 13,21                                        | 6,42                                          |
| <i>DNAJC19</i>   | 662,03                                       | 509,57                                        |
| <i>DNAJC3</i>    | 145,00                                       | 132,00                                        |
| <i>DNAJC6</i>    | 633,32                                       | 54,62                                         |
| <i>DNAJC8</i>    | 106,99                                       | 37,62                                         |
| <i>EDEM1</i>     | 406,49                                       | 110,74                                        |
| <i>EDEM3</i>     | 320,19                                       | 256,49                                        |
| <i>EIF1</i>      | 1477,15                                      | 731,99                                        |
| <i>EIF1AX</i>    | 202,56                                       | 88,85                                         |
| <i>EIF2A</i>     | 52,67                                        | 22,53                                         |
| <i>EIF2AK2</i>   | 344,52                                       | 123,95                                        |
| <i>EIF2AK3</i>   | 120,00                                       | 97,00                                         |
| <i>EIF2B2</i>    | 14,19                                        | 6,94                                          |
| <i>EIF2B4</i>    | 386,37                                       | 186,87                                        |
| <i>EIF3A</i>     | 31,87                                        | 12,62                                         |
| <i>EIF3D</i>     | 817,16                                       | 319,18                                        |
| <i>EIF3E</i>     | 246,46                                       | 93,16                                         |
| <i>EIF3H</i>     | 182,84                                       | 50,99                                         |
| <i>EIF3J</i>     | 979,17                                       | 485,99                                        |
| <i>EIF3K</i>     | 183,10                                       | 88,74                                         |
| <i>EIF3M</i>     | 257,77                                       | 115,81                                        |
| <i>ERN1</i>      | 390,60                                       | 377,32                                        |
| <i>ERN2</i>      | 413,76                                       | 319,32                                        |
| <i>ERO1A</i>     | 470,22                                       | 352,10                                        |
| <i>ERO1B</i>     | 396,96                                       | 144,13                                        |
| <i>FKBP1B</i>    | 54,53                                        | 12,79                                         |
| <i>FKBP5</i>     | 860,12                                       | 542,76                                        |
| <i>FKBP7</i>     | 484,49                                       | 292,37                                        |
| <i>GRPEL2</i>    | 33,48                                        | 11,34                                         |
| <i>HERPUD1</i>   | 653,00                                       | 589,00                                        |
| <i>HERPUD2</i>   | 13302,96                                     | 5390,39                                       |
| <i>HSP90AA1</i>  | 154,39                                       | 52,99                                         |
| <i>HSP90AB1</i>  | 7359,54                                      | 2546,68                                       |

|                      |          |         |
|----------------------|----------|---------|
| <i>HSP90B1</i>       | 2234,00  | 1753,00 |
| <i>HSP90B3P</i>      | 9,14     | 4,31    |
| <i>HSPA14</i>        | 500,62   | 203,37  |
| <i>HSPA1A/HSPA1B</i> | 1351,64  | 445,24  |
| <i>HSPA4</i>         | 3823,82  | 1267,70 |
| <i>HSPA4L</i>        | 1645,63  | 757,66  |
| <i>HSPA5</i>         | 836,86   | 188,99  |
| <i>HSPA8</i>         | 3767,52  | 1766,77 |
| <i>HSPB2</i>         | 1172,44  | 573,58  |
| <i>HSPB7</i>         | 82,85    | 22,70   |
| <i>HSPB8</i>         | 784,99   | 35,24   |
| <i>HSPBAP1</i>       | 605,12   | 142,49  |
| <i>HSPH1</i>         | 256,67   | 133,62  |
| <i>LMAN1</i>         | 1074     | 844     |
| <i>MAN1A2</i>        | 246,91   | 178,21  |
| <i>MAN2A1</i>        | 269,93   | 236,98  |
| <i>MAN2B2</i>        | 124,19   | 97,89   |
| <i>MANBA</i>         | 84,44    | 70,59   |
| <i>NFE2L2</i>        | 281,21   | 134,60  |
| <i>PDIA3</i>         | 125,77   | 53,38   |
| <i>PPIG</i>          | 876,00   | 308,91  |
| <i>RCN2</i>          | 10344,46 | 3983,97 |
| <i>SEC23B</i>        | 1420,95  | 742,30  |
| <i>SEL1L</i>         | 9,87     | 3,91    |
| <i>SSR1</i>          | 76,99    | 35,24   |
| <i>UGGT1</i>         | 47,92    | 33,95   |
| <i>UGGT2</i>         | 1633,64  | 1040,39 |
| <i>XBP1</i>          | 260,37   | 129,23  |

**Table S1. MiaPaCa2 cells siCtrl and siNUPR1 gene expression of proteins related with ER-stress defense pathways.**

| Gene name      | log2FoldChange | p-value   |
|----------------|----------------|-----------|
| <i>Agr2</i>    | -1.29492       | 1.493e-05 |
| <i>Hyou1</i>   | -0,81965       | 0,00039   |
| <i>Hspa5</i>   | -0,75859       | 0,00052   |
| <i>Dnajc1</i>  | -0,72605       | 0,00065   |
| <i>Pdia4</i>   | -0,87943       | 0,00080   |
| <i>Dnajb9</i>  | -0,81762       | 0,00156   |
| <i>Sec11c</i>  | -0,40698       | 0,00163   |
| <i>Herpud2</i> | -0,75244       | 0,00177   |
| <i>Pdia3</i>   | -0,58187       | 0,00304   |
| <i>Atf6</i>    | -0,59943       | 0,00542   |
| <i>Erp44</i>   | -0,41598       | 0,00653   |
| <i>Ssr1</i>    | -0,51263       | 0,00729   |
| <i>Man2a1</i>  | -0,52528       | 0,00828   |
| <i>Sel1l</i>   | -0,41316       | 0,01012   |
| <i>Ssr2</i>    | -0,42123       | 0,01176   |
| <i>Hspa13</i>  | -0,62219       | 0,01211   |
| <i>Dnajc22</i> | -0,66955       | 0,01370   |
| <i>Lman1</i>   | -0,46967       | 0,01439   |
| <i>Uso1</i>    | -0,51128       | 0,01503   |
| <i>Edem3</i>   | -0,56645       | 0,01694   |
| <i>Xbp1</i>    | -0,26568       | 0,02001   |
| <i>Mlec</i>    | -0,26721       | 0,02685   |
| <i>Sec23b</i>  | -0,50919       | 0,03098   |
| <i>Ssr3</i>    | -0,40138       | 0,03900   |
| <i>Pdia6</i>   | -0,37603       | 0,04341   |
| <i>Dnajb14</i> | -0,47681       | 0,04420   |
| <i>Canx</i>    | -0,30906       | 0,04494   |
| <i>Dnaja1</i>  | -0,41550       | 0,04755   |
| <i>Uggt1</i>   | -0,34831       | 0,04972   |

**Table S2. Nupr1<sup>+/+</sup> and Nupr1<sup>-/-</sup> mice gene expression of proteins related with ER-stress defense pathways.**

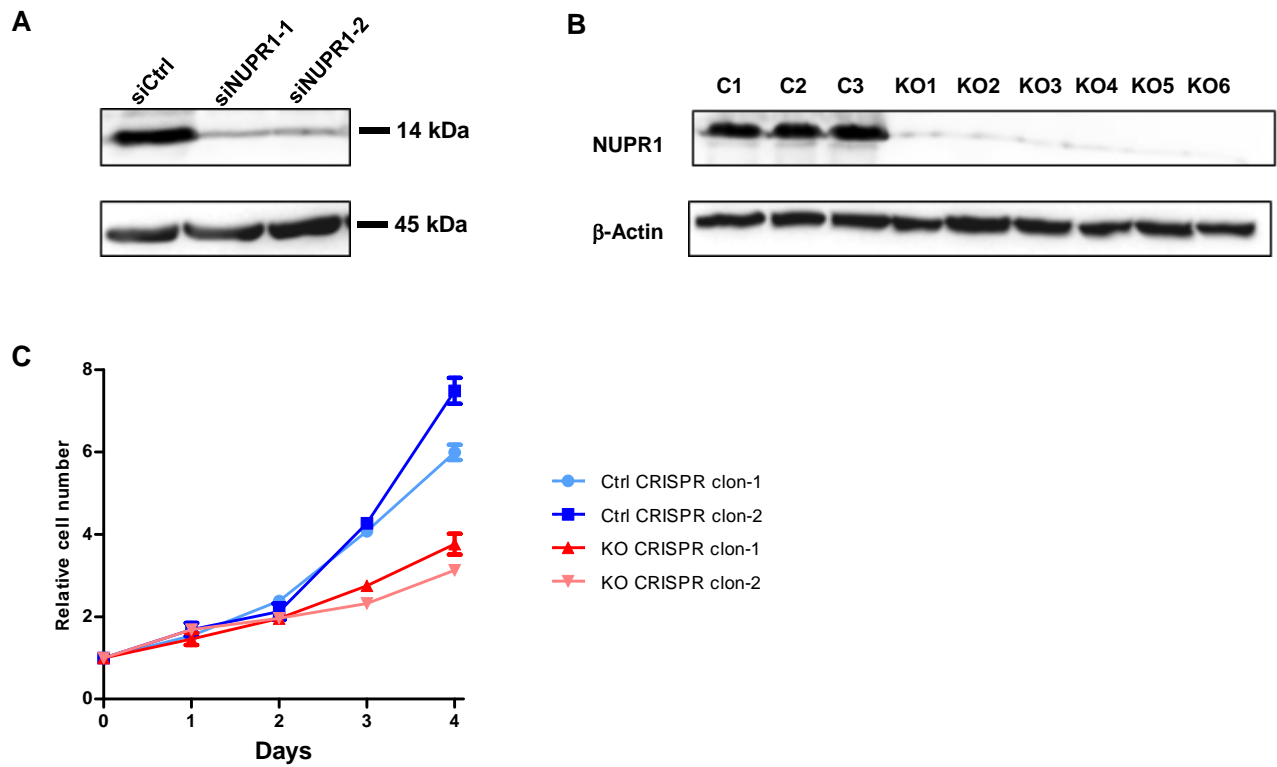

**Figure S1**

**NUPR1 protein expression.** Western blot analysis was performed in MiaPaCa2 cells transfected with siCtrl and siNUPR1-1 and siNUPR1-2 (A) and in 3 control and 6 CRISPR-Cas9 *NUPR1* knockout Panc-1 clones (B) to evaluate the NUPR1 protein levels. Relative growth of 2 control and 2 CRISPR-Cas9 NUPR1 knockout Panc-1 clones are shown (C).

## Caspases 3/7 activity

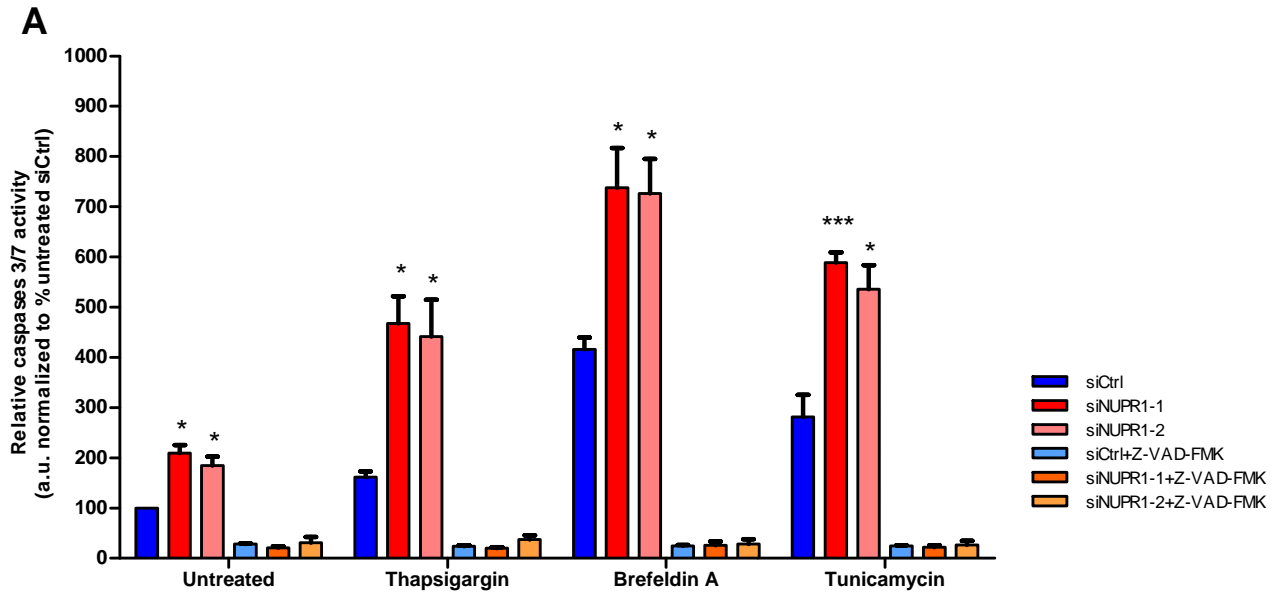

**Figure S2**

**Nupr1 protects from apoptosis in stress situations *in vitro*.** MiaPaCa2 cells were transfected with siCtrl or two different siNupr1 for 48 h. Cells were then incubated with thapsigargin, brefeldin A, or tunicamycin at 1  $\mu$ M, for another 24 h in the presence or not of Z-VAD-FMK (10  $\mu$ M). Caspase 3/7 activity was measured; data values were normalized to the untreated siCtrl. For each treatment, statistically significant differences (\* $p < 0.05$ , \*\* $p < 0.01$ , \*\*\* $p < 0.001$ .) from siCtrl are shown.

A

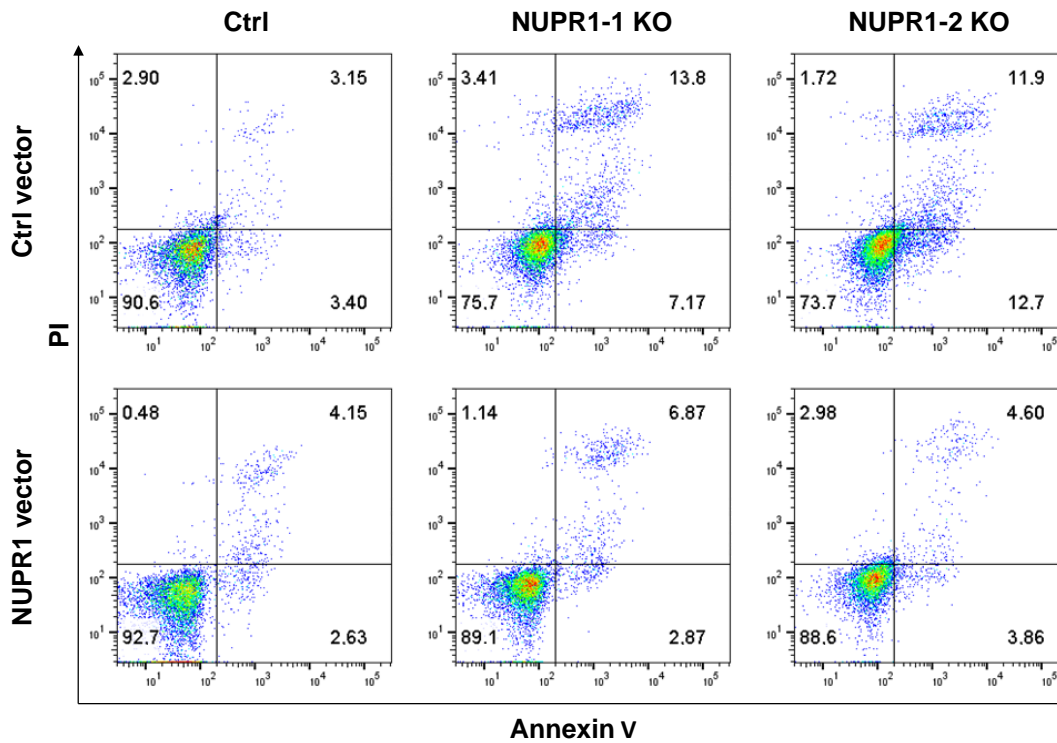

B

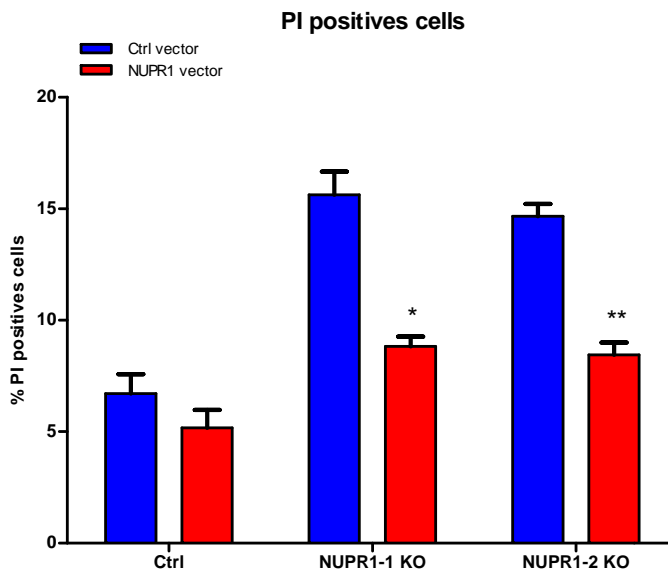

**Figure S3**

**Reconstitution of NUPR1 expression in CRISPR-Cas9 knockout Panc-1 cells reduces cell death.**

Flow cytometry analysis was carried out after Annexin-V and PI staining in 2 independent Panc-1 *Nupr1* knockout clones, transfected with NUPR1-FLAG or a control vector. A representative experiment of the dot plot profile of cells was showed (A). The percentage of PI-positive cells (B) is showed. Data are means of triplicates  $\pm$  SEM of 1 control and 2 *Nupr1* knockout clones. Statistically significant differences (\*p < 0.05, \*\*p < 0.01, \*\*\*p < 0.001.) are shown.

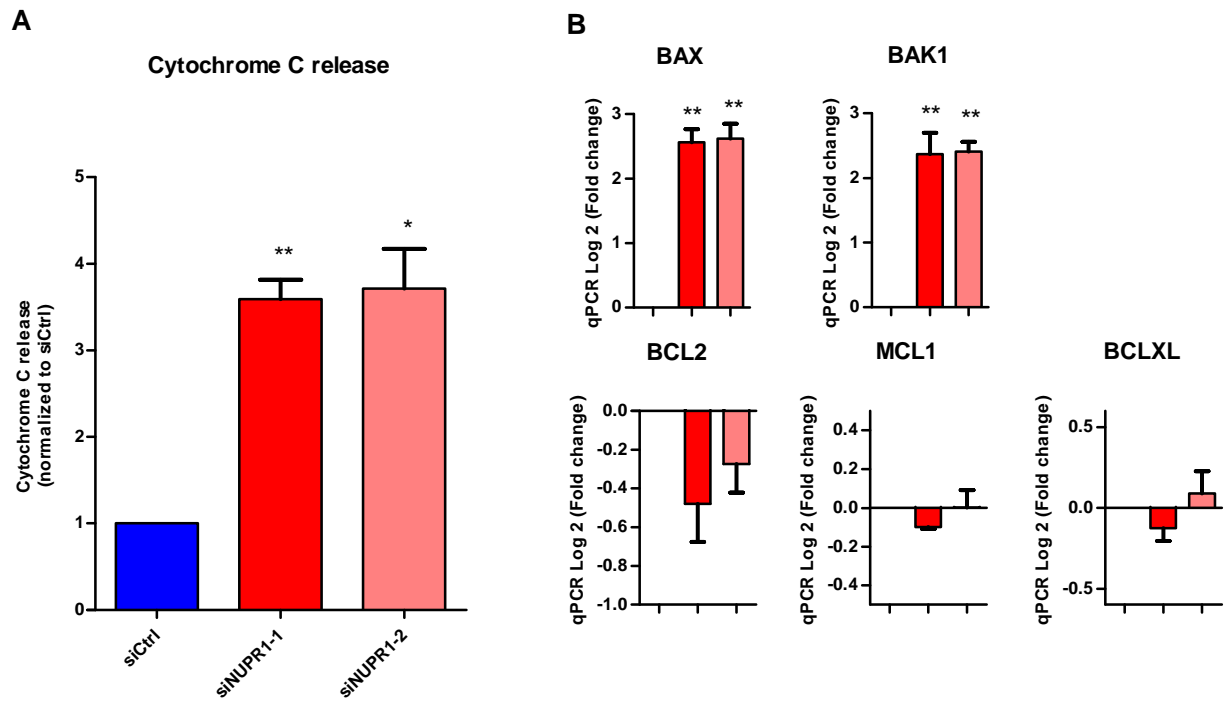

**Figure S4**

**Nupr1 protects from cytochrome c release and BAK/BAX expression.** Flow cytometry analysis of MiaPaCa2 cells transfected with siCtrl, siNUPR1-1, or siNUPR1-2 for 72 h was carried out using Cytochrome c Release Apoptosis Assay Kit for analysis of the cytochrome c release (A). Total RNA was extracted from MiaPaCa2 cells transfected with siCtrl, siNUPR1-1 or siNUPR1-2 for 72 h to evaluate the mRNA levels of Bcl-2 family genes of using RT-qPCR (B). Statistically significant differences from siCtrl (\* $p < 0.05$ , \*\* $p < 0.01$ , \*\*\* $p < 0.001$ ) was shown.



IRE 1 $\alpha$

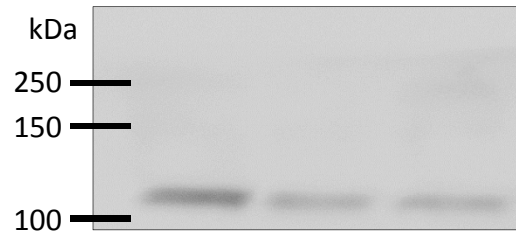

PERK

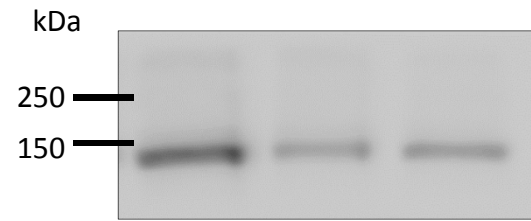

BIP

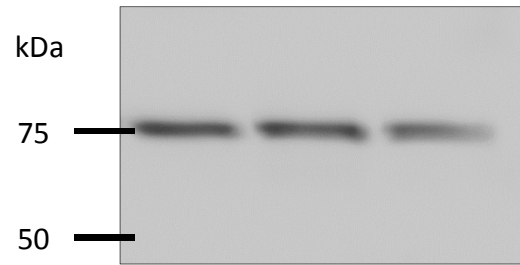

ATF6

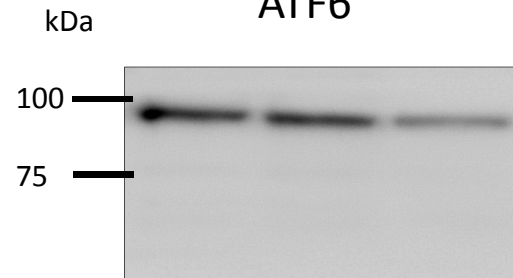

$\beta$ -actin

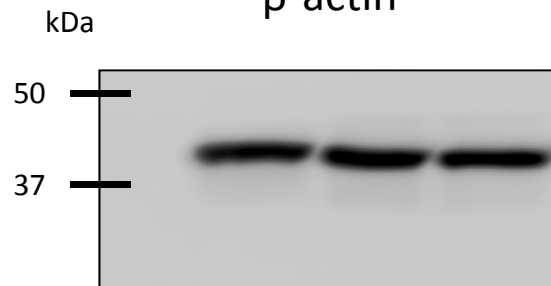

$\beta$ -actin

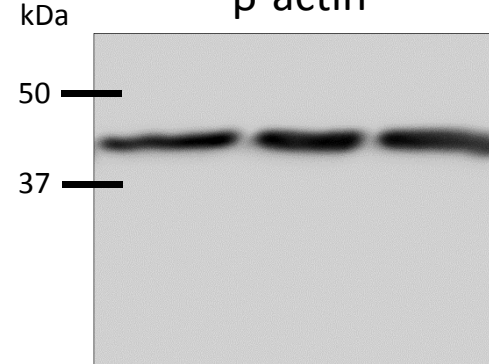

Full-length Western blot images

FIGURE S1

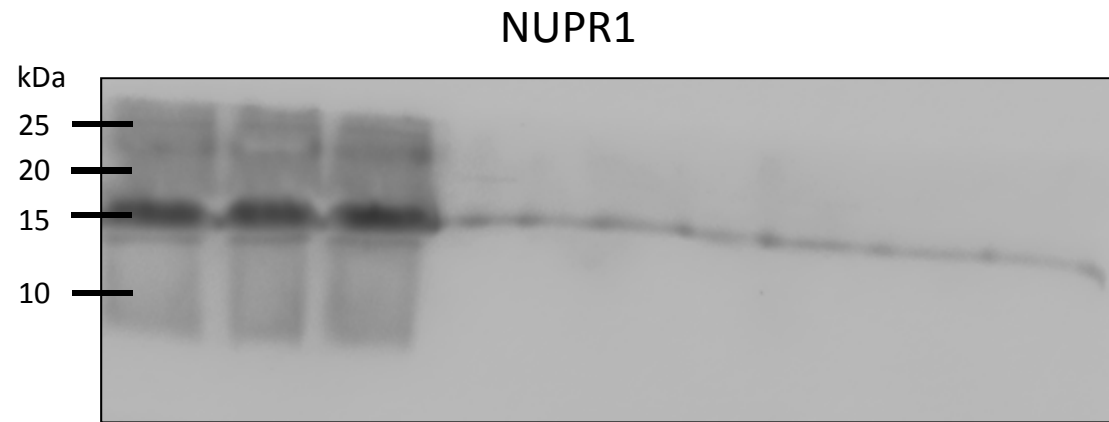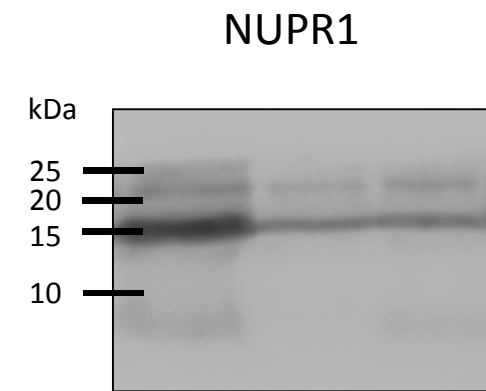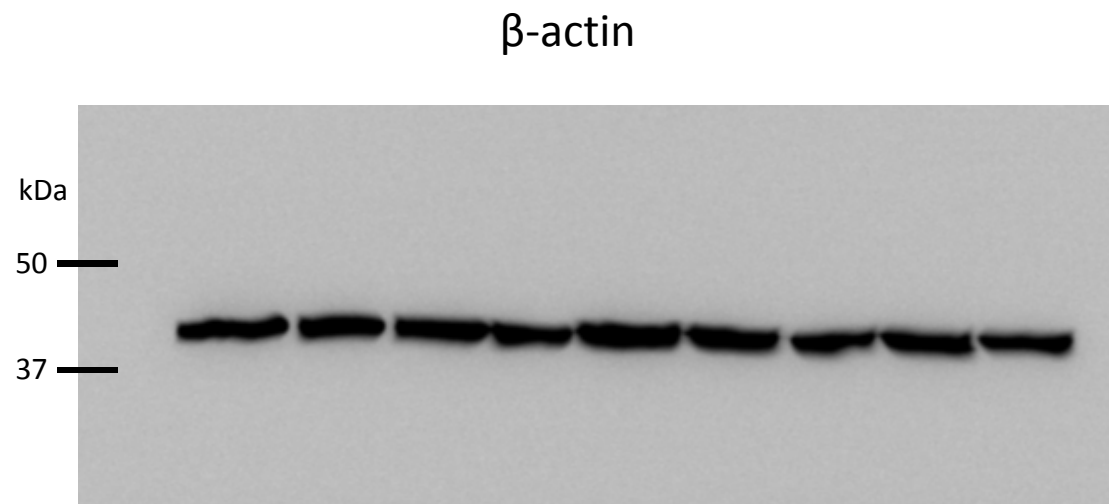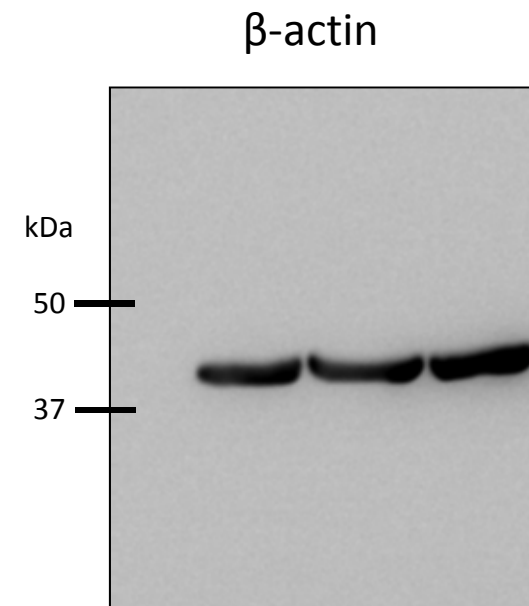

Full-length Western blot images
